# Supplementary material for: MiR-182 regulates cell proliferation and apoptosis in laryngeal squamous cell carcinoma by targeting the CRR9
Source: Oxford University Press journal article supplement (doi:10.1042/bsr20191348), 2019-09-13
Supplement: bsr-2019-1348_supp.pdf [file bsr-2019-1348_supp.pdf]

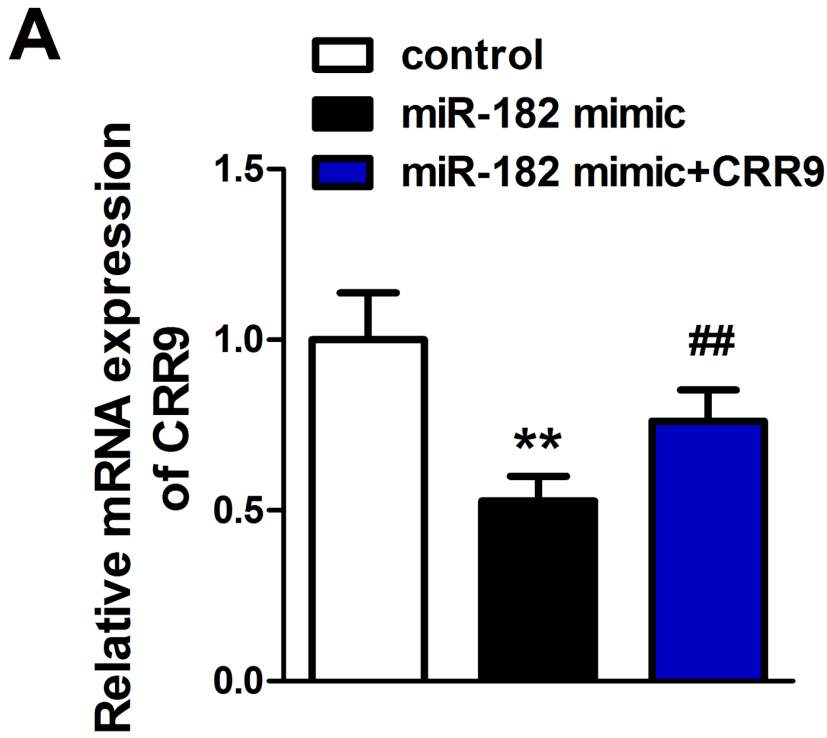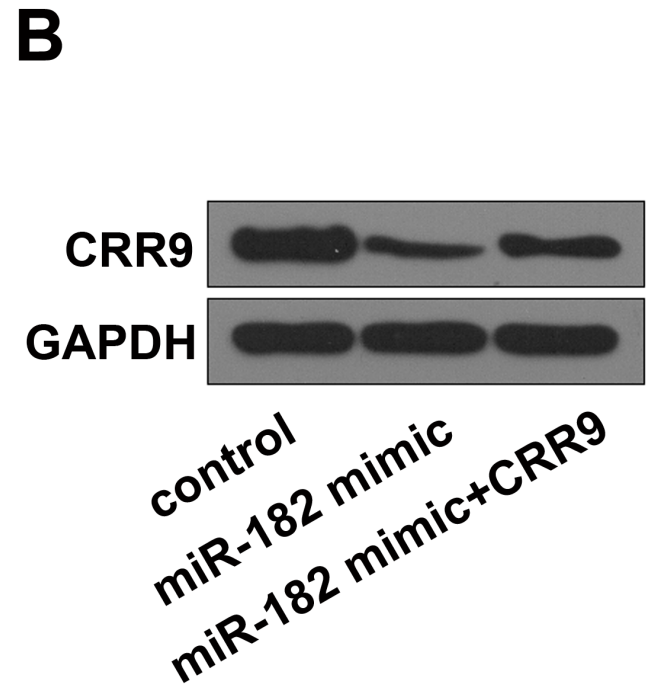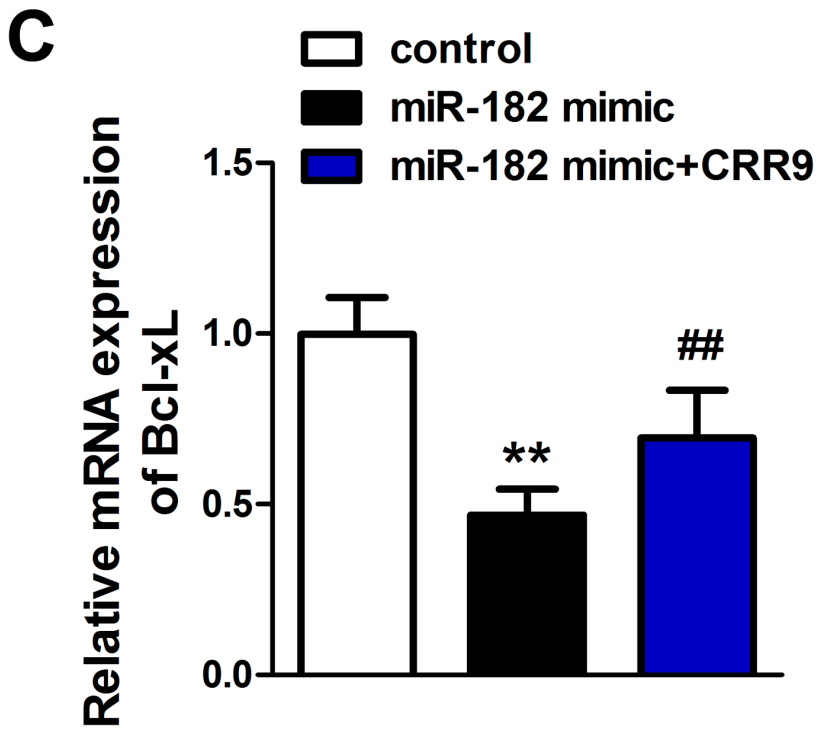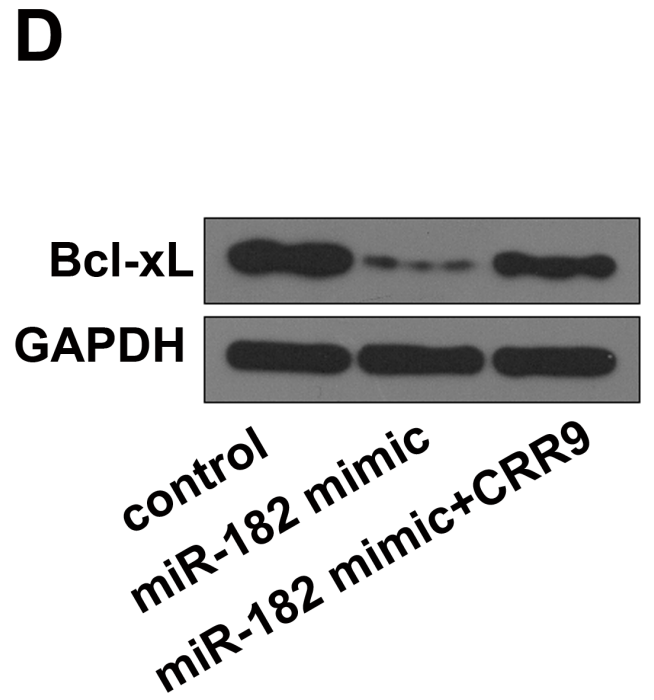

**Supplementary figure 1.** MiR-182 promoted the apoptosis of LSCC by targeting CRR9. qRT-PCR (A) and Western blot (B) analysis of CRR9 expressions. qRT-PCR (C) and Western blot (D) analysis of Bcl-xL expressions.
